# Supplementary material for: The effects of the gas–liquid interface and gas phase on Cl/ClO radical interaction with water molecules
Source: Royal Society of Chemistry journal article supplement (doi:10.1039/d3cp02796a), 2023-01-01
Supplement: d3cp02796a1.pdf [file d3cp02796a1.pdf]

## Supporting information

### **The effects of gas-liquid interface and gas phase on Cl/CIO radicals’ interaction with water molecules**

Qi Zhang,<sup>a</sup> Mohammad Hassan Hadizadeh,<sup>ab</sup> Yongxia Hu,<sup>a</sup> Xiaoyu Zhang,<sup>d</sup> Zupeng Su,<sup>d</sup> Zihan  
Wu,<sup>d</sup> Xiaotong Wang,<sup>a</sup> Fei Xu,<sup>\*ac</sup> Yanhui Sun,<sup>c</sup> Qingzhu Zhang<sup>a</sup> and Wenxing Wang<sup>a</sup>

<sup>a</sup> *Environment Research Institute, Shandong University, Qingdao 266237, China*

<sup>b</sup> *International Center for Quantum Design of Functional Materials (ICQD), Hefei National Laboratory for Physical Sciences at the Microscale, and Synergetic Innovation Center of Quantum Information and Quantum Physics, University of Science and Technology of China, Hefei 230026, China*

<sup>c</sup> *Shenzhen Research Institute of Shandong University, Shenzhen 518057, China*

<sup>d</sup> *School of Environmental Science and Engineering, Shandong University, Qingdao 266237, China*

<sup>e</sup> *College of Environment and Safety Engineering, Qingdao University of Science & Technology, Qingdao 266042, China*

\*Corresponding authors. E-mail: xufei@sdu.edu.cn.

Fax: 86-532-5863 1986

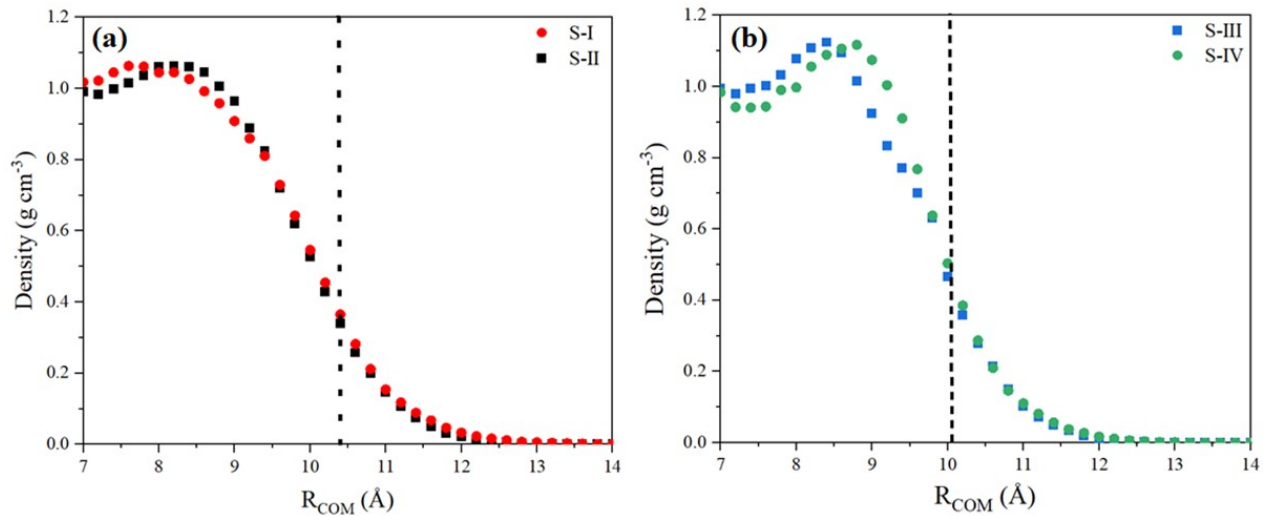

**Fig. S1.** An illustration of the density profile of water molecules relative to the distance from the center of mass of droplet. Where, a vertical dotted line at (a) 10.4 and (b) 10.1 indicates 50% of bulk water density, which is defined as the gas-liquid interface.

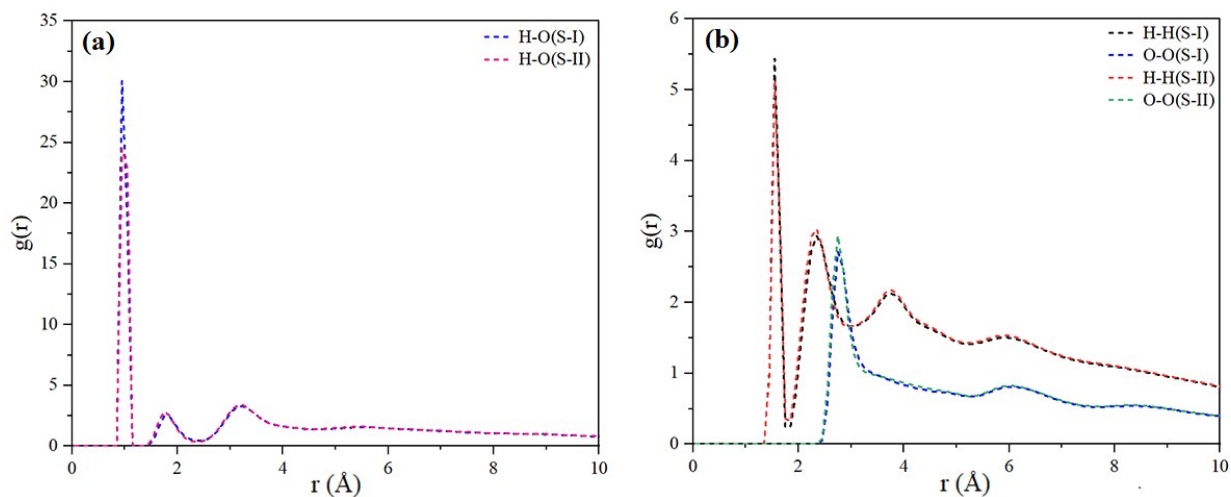

**Fig. S2.** Radial distribution functions for H-O, O-O, H-H related to water molecules in droplet systems S-I and S-II. Where, the RDFs of H-O, O-O, and H-H bonds for both S-I and S-II is almost same.

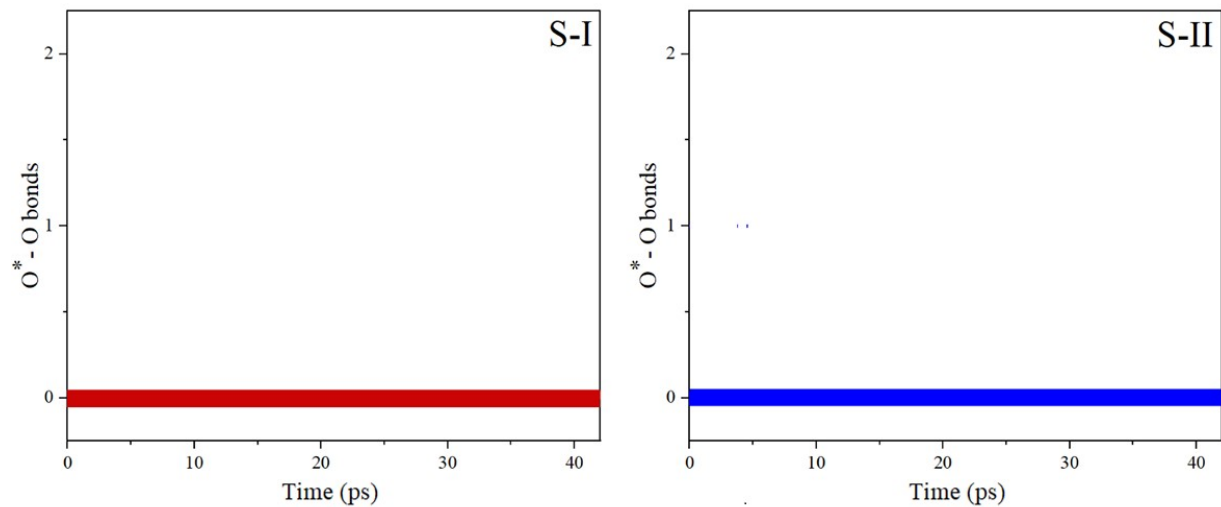

**Fig. S3.** Coordination analysis confirms the lack of hemibond ( $O^*-O \sim 2.3 \text{ \AA}$ ) between ClO radical and neighboring water molecules.

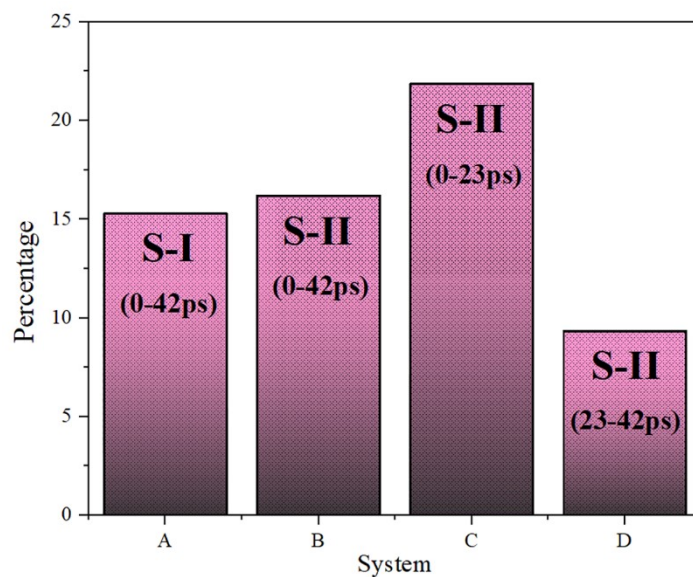

**Fig. S4.** The distribution analysis of O...Cl-O\*...H structures related to S-I and S-II systems within BOMD simulation.

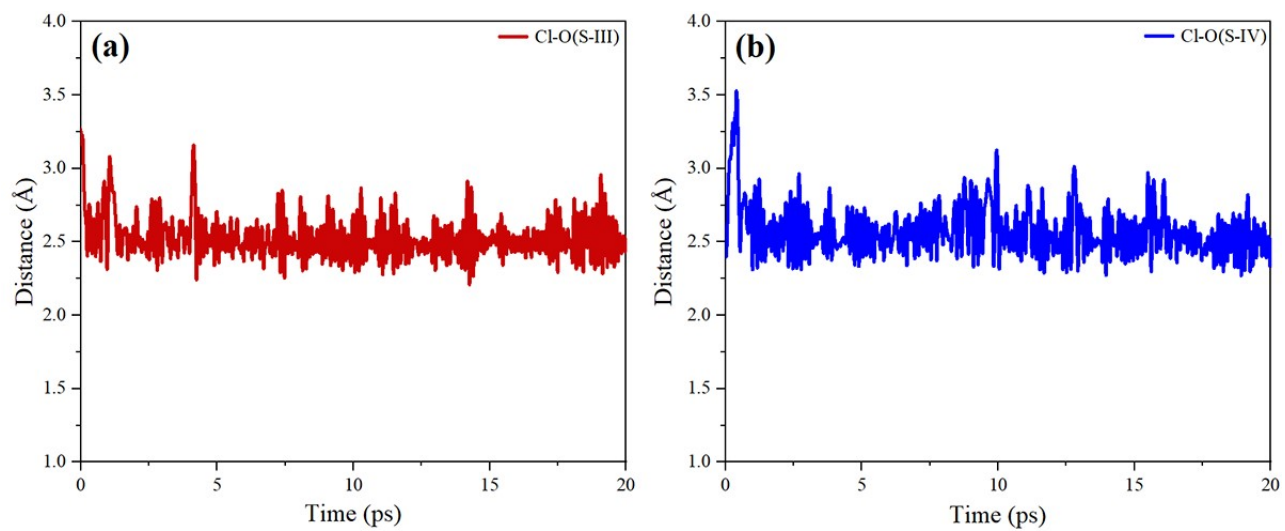

**Fig. S5.** The distance between Cl and O of water molecules in S-III and S-IV systems.

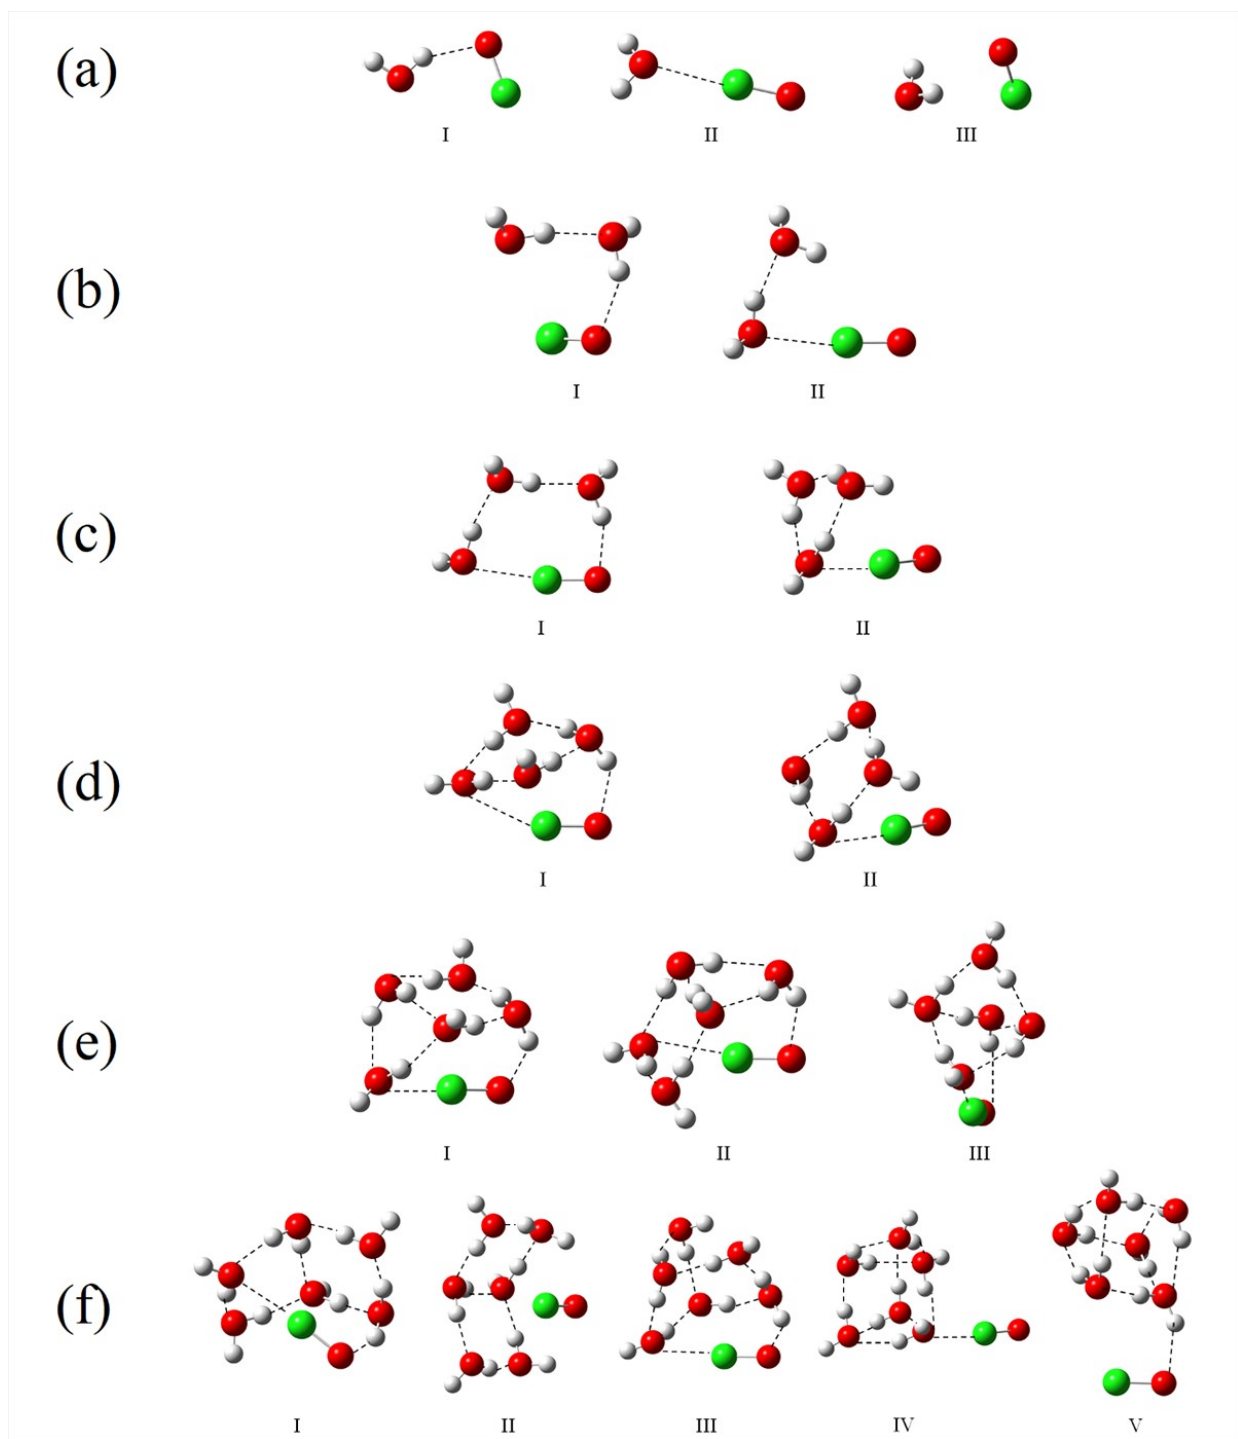

**Fig. S6.** The low-lying structures after optimization of  $\text{ClO}(\text{H}_2\text{O})_n$ . Where (a) to (f) are related to  $\text{ClO}(\text{H}_2\text{O})_1$  to  $\text{ClO}(\text{H}_2\text{O})_6$ , respectively.

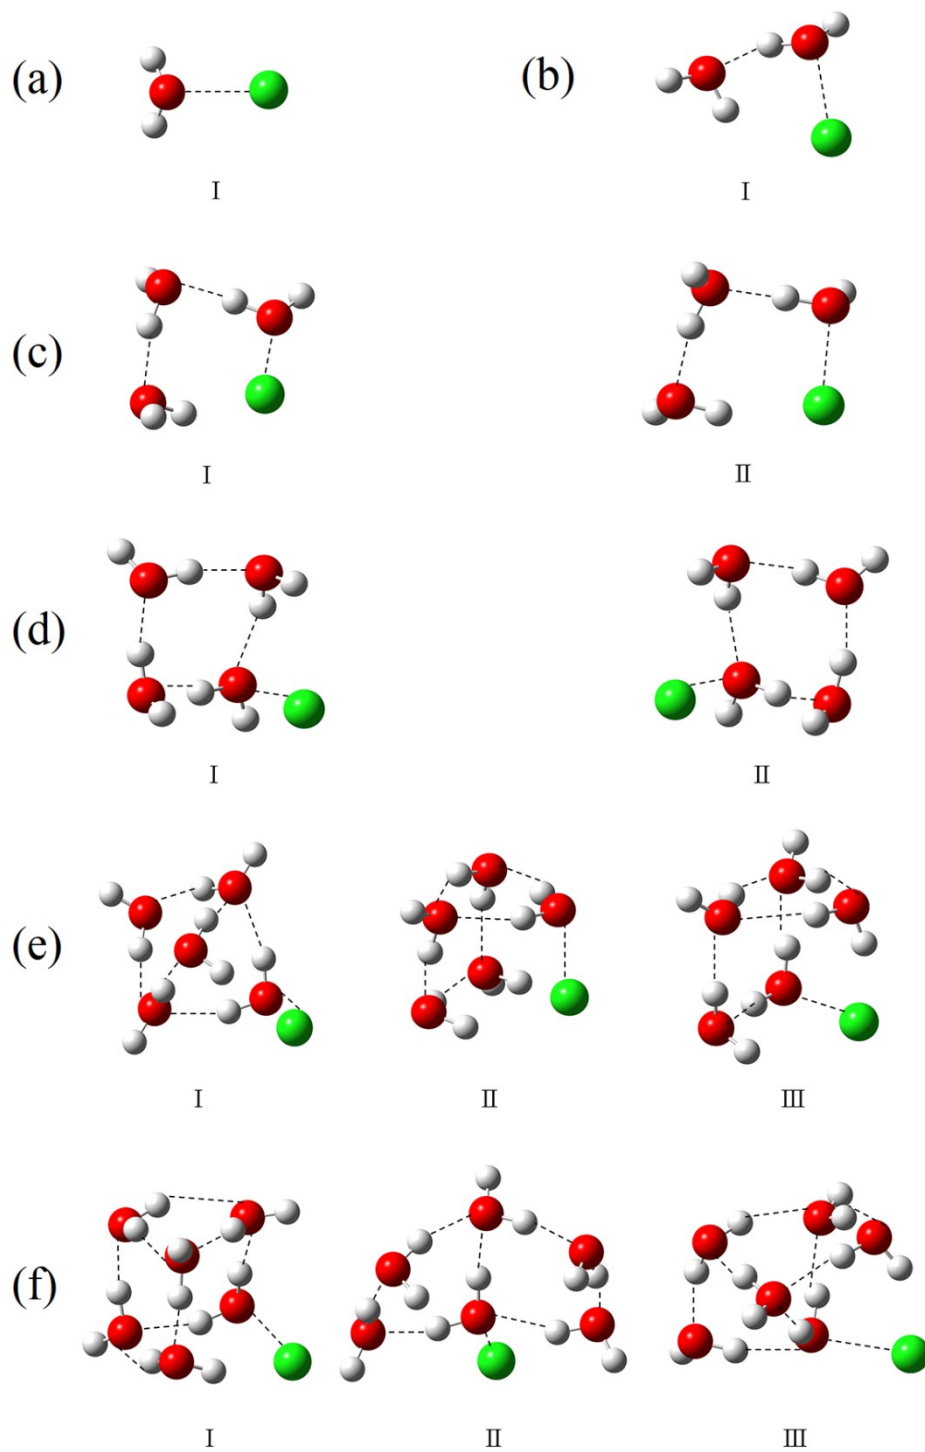

**Fig. S7.** The low-lying structures after optimization of  $\text{Cl}(\text{H}_2\text{O})_n$ . Where (a) to (f) are related to  $\text{Cl}(\text{H}_2\text{O})_1$  to  $\text{Cl}(\text{H}_2\text{O})_6$ , respectively.

**Table S1.** Relative energies of ClO(H<sub>2</sub>O)<sub>n</sub> clusters (in kcal mol<sup>-1</sup>) with respect to the total energy of the most stable structures in corresponding ClO(H<sub>2</sub>O)<sub>1-6</sub> clusters.

| ClO(H <sub>2</sub> O) <sub>n</sub> | Structure | Relative Energy (kcal mol <sup>-1</sup> ) |
|------------------------------------|-----------|-------------------------------------------|
| ClO(H <sub>2</sub> O) <sub>1</sub> | I         | 0.00                                      |
|                                    | II        | 0.08                                      |
|                                    | III       | 1.41                                      |
| ClO(H <sub>2</sub> O) <sub>2</sub> | I         | 0.00                                      |
|                                    | II        | 0.36                                      |
| ClO(H <sub>2</sub> O) <sub>3</sub> | I         | 0.00                                      |
|                                    | II        | 0.16                                      |
| ClO(H <sub>2</sub> O) <sub>4</sub> | I         | 0.00                                      |
|                                    | II        | 1.15                                      |
| ClO(H <sub>2</sub> O) <sub>5</sub> | I         | 0.00                                      |
|                                    | II        | 0.03                                      |
|                                    | III       | 1.32                                      |
| ClO(H <sub>2</sub> O) <sub>6</sub> | I         | 0.00                                      |
|                                    | II        | 1.75                                      |
|                                    | III       | 1.91                                      |
|                                    | IV        | 2.18                                      |
|                                    | V         | 2.92                                      |

**Table S2.** Relative energies of Cl(H<sub>2</sub>O)<sub>n</sub> clusters (in kcal mol<sup>-1</sup>) with respect to the total energy of the most stable structures in corresponding Cl(H<sub>2</sub>O)<sub>3-6</sub> clusters.

| Cl(H <sub>2</sub> O) <sub>n</sub> | Structure | Relative Energy (kcal mol <sup>-1</sup> ) |
|-----------------------------------|-----------|-------------------------------------------|
| Cl(H <sub>2</sub> O) <sub>3</sub> | I         | 0.00                                      |
|                                   | II        | 0.30                                      |
| Cl(H <sub>2</sub> O) <sub>4</sub> | I         | 0.00                                      |
|                                   | II        | 0.16                                      |
| Cl(H <sub>2</sub> O) <sub>5</sub> | I         | 0.00                                      |
|                                   | II        | 0.92                                      |
|                                   | III       | 1.40                                      |
| Cl(H <sub>2</sub> O) <sub>6</sub> | I         | 0.00                                      |
|                                   | II        | 0.64                                      |
|                                   | III       | 1.21                                      |

**Table S3.** Bond length (in Å) in ClO(H<sub>2</sub>O)<sub>1-6</sub> clusters along with their dipole moments.

| ClO(H <sub>2</sub> O) <sub>n</sub> | O*-H/O-H/Cl-O*/Cl-O Bond  | Bond Length (Å) | Dipole Moment |
|------------------------------------|---------------------------|-----------------|---------------|
| ClO(H <sub>2</sub> O) <sub>1</sub> | <i>R</i> <sub>O1Cl</sub>  | 1.55            | 0.72          |
|                                    | <i>R</i> <sub>O1H1</sub>  | 2.06            |               |
|                                    | <i>R</i> <sub>O2Cl</sub>  | 3.28            |               |
| ClO(H <sub>2</sub> O) <sub>2</sub> | <i>R</i> <sub>O1Cl</sub>  | 1.55            | 1.40          |
|                                    | <i>R</i> <sub>O1H1</sub>  | 2.02            |               |
|                                    | <i>R</i> <sub>O2H3</sub>  | 1.90            |               |
|                                    | <i>R</i> <sub>O3Cl</sub>  | 3.06            |               |
| ClO(H <sub>2</sub> O) <sub>3</sub> | <i>R</i> <sub>O1Cl</sub>  | 1.56            | 1.99          |
|                                    | <i>R</i> <sub>O1H1</sub>  | 1.98            |               |
|                                    | <i>R</i> <sub>O2H3</sub>  | 1.85            |               |
|                                    | <i>R</i> <sub>O3H5</sub>  | 1.83            |               |
|                                    | <i>R</i> <sub>O4Cl</sub>  | 2.66            |               |
| ClO(H <sub>2</sub> O) <sub>4</sub> | <i>R</i> <sub>O1Cl</sub>  | 1.56            | 3.53          |
|                                    | <i>R</i> <sub>O1H1</sub>  | 2.21            |               |
|                                    | <i>R</i> <sub>O3H2</sub>  | 1.83            |               |
|                                    | <i>R</i> <sub>O4H3</sub>  | 1.83            |               |
|                                    | <i>R</i> <sub>O5H5</sub>  | 1.75            |               |
|                                    | <i>R</i> <sub>O2H7</sub>  | 1.74            |               |
|                                    | <i>R</i> <sub>O4Cl</sub>  | 2.89            |               |
| ClO(H <sub>2</sub> O) <sub>5</sub> | <i>R</i> <sub>O1Cl</sub>  | 1.56            | 2.66          |
|                                    | <i>R</i> <sub>O1H1</sub>  | 2.20            |               |
|                                    | <i>R</i> <sub>O3H2</sub>  | 1.77            |               |
|                                    | <i>R</i> <sub>O4H3</sub>  | 1.76            |               |
|                                    | <i>R</i> <sub>O5H5</sub>  | 2.10            |               |
|                                    | <i>R</i> <sub>O6H7</sub>  | 1.88            |               |
|                                    | <i>R</i> <sub>O6H6</sub>  | 1.95            |               |
|                                    | <i>R</i> <sub>O2H9</sub>  | 1.69            |               |
|                                    | <i>R</i> <sub>O5Cl</sub>  | 2.77            |               |
| ClO(H <sub>2</sub> O) <sub>6</sub> | <i>R</i> <sub>O1Cl</sub>  | 1.56            | 1.98          |
|                                    | <i>R</i> <sub>O1H1</sub>  | 2.08            |               |
|                                    | <i>R</i> <sub>O3H2</sub>  | 1.75            |               |
|                                    | <i>R</i> <sub>O4H3</sub>  | 1.72            |               |
|                                    | <i>R</i> <sub>O5H5</sub>  | 1.88            |               |
|                                    | <i>R</i> <sub>O6H7</sub>  | 1.75            |               |
|                                    | <i>R</i> <sub>O7H9</sub>  | 1.77            |               |
|                                    | <i>R</i> <sub>O7H6</sub>  | 1.94            |               |
|                                    | <i>R</i> <sub>O2H11</sub> | 1.64            |               |
|                                    | <i>R</i> <sub>O5Cl</sub>  | 2.75            |               |



**Table S4.** Bond length (in Å) in Cl(H<sub>2</sub>O)<sub>1-6</sub> clusters along with their dipole moments.

| Cl(H <sub>2</sub> O) <sub>n</sub> | O-H/Cl-O/Cl-H Bond        | Bond Length (Å) | Dipole Moment |
|-----------------------------------|---------------------------|-----------------|---------------|
| Cl(H <sub>2</sub> O) <sub>1</sub> | <i>R</i> <sub>OCl</sub>   | 2.57            | 2.33          |
| Cl(H <sub>2</sub> O) <sub>2</sub> | <i>R</i> <sub>O1Cl</sub>  | 2.40            | 2.23          |
|                                   | <i>R</i> <sub>O2H1</sub>  | 1.80            |               |
|                                   | <i>R</i> <sub>H4Cl</sub>  | 2.53            |               |
| Cl(H <sub>2</sub> O) <sub>3</sub> | <i>R</i> <sub>O1Cl</sub>  | 2.35            | 1.07          |
|                                   | <i>R</i> <sub>O2H2</sub>  | 1.67            |               |
|                                   | <i>R</i> <sub>O3H3</sub>  | 1.79            |               |
|                                   | <i>R</i> <sub>H6Cl</sub>  | 2.32            |               |
| Cl(H <sub>2</sub> O) <sub>4</sub> | <i>R</i> <sub>O4Cl</sub>  | 2.40            | 0.98          |
|                                   | <i>R</i> <sub>O4H2</sub>  | 1.95            |               |
|                                   | <i>R</i> <sub>O1H3</sub>  | 1.77            |               |
|                                   | <i>R</i> <sub>O2H5</sub>  | 1.73            |               |
|                                   | <i>R</i> <sub>O3H8</sub>  | 1.59            |               |
| Cl(H <sub>2</sub> O) <sub>5</sub> | <i>R</i> <sub>H1Cl</sub>  | 2.89            | 4.42          |
|                                   | <i>R</i> <sub>O1Cl</sub>  | 2.34            |               |
|                                   | <i>R</i> <sub>O2H2</sub>  | 1.88            |               |
|                                   | <i>R</i> <sub>O3H4</sub>  | 1.75            |               |
|                                   | <i>R</i> <sub>O4H5</sub>  | 1.83            |               |
|                                   | <i>R</i> <sub>O4H1</sub>  | 1.90            |               |
|                                   | <i>R</i> <sub>O5H8</sub>  | 1.69            |               |
| <i>R</i> <sub>O2H9</sub>          | 1.94                      |                 |               |
| Cl(H <sub>2</sub> O) <sub>6</sub> | <i>R</i> <sub>H10Cl</sub> | 2.35            | 3.10          |
|                                   | <i>R</i> <sub>O1Cl</sub>  | 2.33            |               |
|                                   | <i>R</i> <sub>O2H2</sub>  | 1.77            |               |
|                                   | <i>R</i> <sub>O2H5</sub>  | 2.25            |               |
|                                   | <i>R</i> <sub>O3H7</sub>  | 1.72            |               |
|                                   | <i>R</i> <sub>O4H9</sub>  | 1.90            |               |
|                                   | <i>R</i> <sub>O4H1</sub>  | 1.86            |               |
|                                   | <i>R</i> <sub>O5H12</sub> | 1.64            |               |
|                                   | <i>R</i> <sub>O6H6</sub>  | 1.90            |               |
| <i>R</i> <sub>O6H3</sub>          | 1.81                      |                 |               |
| <i>R</i> <sub>H10Cl</sub>         | 2.30                      |                 |               |

---

**Coordinates of the ClO(H<sub>2</sub>O)<sub>1-6</sub> geometries optimized with M06-2X/6-311++G(3df,3pd)**

---

**(a)-I**

|     |           |           |           |
|-----|-----------|-----------|-----------|
| 0 2 |           |           |           |
| O   | -2.185248 | -0.272701 | 0.000051  |
| H   | -3.045316 | 0.149632  | -0.000386 |
| H   | -1.545580 | 0.445960  | 0.000078  |
| Cl  | 1.092430  | -0.387819 | -0.000010 |
| O   | 0.437697  | 1.022367  | 0.000008  |

**(a)-II**

|     |           |           |           |
|-----|-----------|-----------|-----------|
| 0 2 |           |           |           |
| O   | 2.295718  | 0.000010  | -0.058532 |
| H   | 2.796894  | 0.760418  | 0.242163  |
| H   | 2.787937  | -0.767293 | 0.239461  |
| Cl  | -0.459552 | 0.000977  | -0.011212 |
| O   | -2.017275 | -0.001226 | 0.022154  |

**(a)-III**

|     |           |           |           |
|-----|-----------|-----------|-----------|
| 0 2 |           |           |           |
| O   | -2.298603 | -0.238437 | -0.000166 |
| H   | -1.929908 | 0.228768  | -0.752699 |
| H   | -1.930707 | 0.225302  | 0.754890  |
| Cl  | 1.087824  | -0.398697 | -0.000168 |
| O   | 0.469555  | 1.028910  | 0.000251  |

**(b)-I**

|     |           |           |           |
|-----|-----------|-----------|-----------|
| 0 2 |           |           |           |
| Cl  | 1.256445  | -0.483613 | -0.255529 |
| O   | 1.252313  | 0.831191  | 0.568902  |
| O   | -1.499139 | 1.437910  | -0.135042 |
| H   | -0.570954 | 1.561363  | 0.099258  |
| H   | -1.608496 | 1.841336  | -0.997953 |
| O   | -1.638370 | -1.401892 | 0.130876  |
| H   | -1.737264 | -0.444304 | 0.027508  |
| H   | -2.361289 | -1.674648 | 0.697283  |

**(b)-II**

|     |           |           |           |
|-----|-----------|-----------|-----------|
| 0 2 |           |           |           |
| Cl  | 0.998751  | 0.239431  | 0.005122  |
| O   | 2.327924  | -0.57595  | -0.008596 |
| O   | -2.100307 | -1.291121 | -0.097603 |
| H   | -1.786544 | 2.038209  | -0.560197 |
| H   | -1.161073 | -1.495109 | -0.054636 |
| O   | -1.429234 | 1.437793  | 0.095534  |
| H   | -1.913524 | 0.606058  | -0.005359 |
| H   | -2.504693 | -1.785269 | 0.618448  |

**(c)-I**

0 2

|    |           |           |           |
|----|-----------|-----------|-----------|
| Cl | -0.432365 | -1.159900 | -0.016249 |
| O  | -1.968882 | -0.897526 | -0.012939 |
| O  | 2.222079  | -1.010635 | -0.034848 |
| H  | 2.867782  | -1.234723 | 0.636286  |
| H  | 2.096487  | -0.046927 | 0.019183  |
| O  | 1.503609  | 1.682936  | 0.035678  |
| H  | 1.794987  | 2.222191  | -0.701450 |
| H  | 0.533455  | 1.751167  | 0.037496  |
| O  | -1.307414 | 1.912520  | -0.025326 |
| H  | -1.783359 | 1.070825  | -0.040467 |
| H  | -1.754287 | 2.457400  | 0.624667  |

**(c)-II**

0 2

|    |           |           |           |
|----|-----------|-----------|-----------|
| Cl | 1.370730  | -0.223082 | -0.131052 |
| O  | 2.664786  | 0.507057  | 0.334207  |
| O  | -1.801521 | -0.077287 | 1.551574  |
| H  | -1.791181 | 0.685480  | 0.950662  |
| H  | -1.068267 | 0.060276  | 2.154813  |
| O  | -1.094269 | -1.338813 | -0.772533 |
| H  | -1.410362 | -1.187946 | 0.137244  |
| H  | -1.431698 | -2.188578 | -1.058086 |
| O  | -1.523309 | 1.406755  | -0.790788 |
| H  | -1.447515 | 0.528282  | -1.191710 |
| H  | -2.118886 | 1.913178  | -1.344714 |

**(d)-I**

0 2

|    |           |           |           |
|----|-----------|-----------|-----------|
| Cl | 1.192915  | 0.918204  | -0.105289 |
| O  | 2.377205  | -0.088589 | -0.056369 |
| O  | 0.103752  | -2.053710 | 0.096102  |
| H  | 1.043619  | -1.845191 | 0.073014  |
| H  | -0.248326 | -1.556765 | 0.856695  |
| O  | -1.012565 | -0.310728 | 1.954294  |
| H  | -1.349007 | 0.391521  | 1.369935  |
| H  | -1.729422 | -0.537937 | 2.548105  |
| O  | -1.641417 | 1.479781  | -0.071615 |
| H  | -2.375061 | 2.067029  | -0.257226 |
| H  | -1.631142 | 0.797145  | -0.775503 |
| O  | -1.248049 | -0.598809 | -1.753196 |
| H  | -0.740474 | -1.199004 | -1.163688 |
| H  | -1.881150 | -1.149828 | -2.215149 |

**(d)-II**

0 2

|    |           |           |           |
|----|-----------|-----------|-----------|
| Cl | -1.537874 | -0.151859 | 0.187916  |
| O  | -2.685863 | 0.251248  | -0.783880 |
| O  | 1.135473  | 1.833368  | 0.883550  |
| H  | 1.021873  | 0.975903  | 1.333668  |
| H  | 0.317474  | 2.312428  | 1.030645  |
| O  | 1.490151  | 0.770874  | -1.605918 |
| H  | 2.256781  | 1.143967  | -2.043741 |
| H  | 1.379971  | 1.271046  | -0.772206 |
| O  | 1.435863  | -1.776360 | -0.677944 |
| H  | 1.505694  | -0.909998 | -1.130746 |
| H  | 0.731894  | -2.249047 | -1.126317 |
| O  | 0.726002  | -0.765600 | 1.700711  |
| H  | 1.079428  | -1.210744 | 2.472031  |
| H  | 1.037745  | -1.260194 | 0.909946  |

**(e)-I**

0 2

|    |           |           |           |
|----|-----------|-----------|-----------|
| Cl | -0.742555 | 1.368094  | -0.346620 |
| O  | -2.241803 | 1.113733  | -0.018439 |
| O  | -1.173826 | -1.227078 | 1.443419  |
| H  | -1.814495 | -0.509586 | 1.397046  |
| H  | -1.171594 | -1.591022 | 0.535427  |
| O  | 1.711728  | -1.196518 | -1.110968 |
| H  | 1.773981  | -1.191034 | -0.144281 |
| H  | 1.932048  | -0.285709 | -1.339965 |
| O  | 1.377621  | -0.459987 | 1.623472  |
| H  | 1.743641  | -0.802819 | 2.440123  |
| H  | 0.414981  | -0.690608 | 1.628688  |
| O  | -0.918987 | -1.867780 | -1.199855 |
| H  | 0.029246  | -1.653662 | -1.316652 |
| H  | -1.066538 | -2.706231 | -1.639300 |
| O  | 2.020730  | 1.508189  | -0.256379 |
| H  | 1.919784  | 1.005832  | 0.569197  |
| H  | 2.658668  | 2.202770  | -0.087729 |

**(e)-II**

0 2

|    |           |           |           |
|----|-----------|-----------|-----------|
| Cl | -1.227608 | -1.10933  | 0.024962  |
| O  | -2.472937 | -0.496064 | -0.679481 |
| O  | 1.211902  | -1.653916 | 1.137713  |
| H  | 1.592122  | -1.524625 | 0.245657  |
| H  | 1.753890  | -2.304886 | 1.585486  |
| O  | -1.346117 | 2.115081  | 0.187487  |
| H  | -0.659023 | 2.139636  | -0.490595 |

|   |           |           |           |
|---|-----------|-----------|-----------|
| H | -2.019209 | 1.518872  | -0.156332 |
| O | 1.950130  | -0.937849 | -1.376052 |
| H | 1.490969  | -1.294884 | -2.137877 |
| H | 1.766559  | 0.021447  | -1.366146 |
| O | 0.903325  | 1.130079  | 1.619453  |
| H | -0.035281 | 1.338287  | 1.495647  |
| H | 0.969171  | 0.163897  | 1.668361  |
| O | 1.342350  | 1.698620  | -0.919277 |
| H | 1.976009  | 2.397995  | -1.089452 |
| H | 1.324911  | 1.555269  | 0.062158  |

**(e)-III**

0 2

|    |           |           |           |
|----|-----------|-----------|-----------|
| Cl | 2.019753  | 0.480945  | -0.033016 |
| O  | 2.833282  | -0.843765 | 0.051554  |
| O  | -1.234344 | 0.138503  | 1.603036  |
| H  | -2.068138 | -0.059309 | 1.110855  |
| H  | -1.461358 | 0.195096  | 2.532799  |
| O  | 0.040129  | -1.982567 | 0.131074  |
| H  | -0.227442 | -1.364484 | 0.826540  |
| H  | 0.999788  | -2.037208 | 0.185169  |
| O  | -0.210096 | 2.114069  | -0.086167 |
| H  | -0.674926 | 2.952452  | -0.085478 |
| H  | -0.597138 | 1.578000  | 0.628129  |
| O  | -1.067865 | -0.144705 | -1.708306 |
| H  | -0.559228 | -0.835189 | -1.249841 |
| H  | -0.685386 | 0.692065  | -1.409659 |
| O  | -3.214078 | -0.274316 | -0.108643 |
| H  | -3.686820 | -1.103204 | -0.199833 |
| H  | -2.551368 | -0.252027 | -0.837777 |

**(f)-I**

0 2

|   |           |           |           |
|---|-----------|-----------|-----------|
| O | 2.211855  | -0.612948 | -1.420085 |
| H | 2.809677  | -1.088831 | -1.997890 |
| H | 1.307150  | -0.947278 | -1.611211 |
| O | -2.117615 | 0.627690  | -1.345033 |
| H | -2.870323 | 0.871560  | -1.885268 |
| H | -2.462716 | 0.350151  | -0.472336 |
| O | -0.312152 | -1.526253 | -1.589911 |
| H | -0.426562 | -1.820810 | -0.674483 |
| H | -0.963835 | -0.816647 | -1.700376 |
| O | -2.613398 | -0.285452 | 1.155105  |
| H | -1.827970 | -0.848605 | 1.296046  |
| H | -2.643489 | 0.320129  | 1.897412  |

|    |           |           |           |
|----|-----------|-----------|-----------|
| O  | 2.001261  | -0.733603 | 1.281455  |
| H  | 2.233810  | -0.740304 | 0.329714  |
| H  | 1.968029  | 0.203293  | 1.505837  |
| O  | -0.373215 | -1.858574 | 1.261372  |
| H  | 0.522929  | -1.432864 | 1.339549  |
| H  | -0.333012 | -2.684712 | 1.746001  |
| Cl | 0.116409  | 1.607179  | -0.073701 |
| O  | 1.291683  | 2.053250  | 0.842087  |

**(f)-II**

0 2

|    |           |           |           |
|----|-----------|-----------|-----------|
| O  | -0.164628 | -0.413652 | 2.083482  |
| H  | -0.996905 | -0.668667 | 1.610845  |
| H  | -0.319600 | -0.557914 | 3.018474  |
| O  | 2.451918  | 1.440010  | -0.508910 |
| H  | 2.524168  | 0.577058  | -0.056381 |
| H  | 3.238618  | 1.933513  | -0.271999 |
| O  | -2.353040 | -0.931836 | 0.677431  |
| H  | -2.142549 | -1.609941 | 0.029643  |
| H  | -2.490995 | -0.104045 | 0.169734  |
| O  | 2.286075  | -0.942531 | 0.861575  |
| H  | 1.450104  | -0.837562 | 1.349310  |
| H  | 2.147400  | -1.715936 | 0.308860  |
| O  | -0.037671 | 2.015978  | 0.593323  |
| H  | -0.011655 | 1.324089  | 1.269885  |
| H  | 0.833391  | 1.976415  | 0.161542  |
| O  | -2.35864  | 1.447392  | -0.628151 |
| H  | -3.005142 | 2.139869  | -0.484237 |
| H  | -1.512461 | 1.772170  | -0.247107 |
| Cl | 0.094445  | -0.558946 | -1.476479 |
| O  | 0.010993  | -1.956231 | -0.798552 |

**(f)-III**

0 2

|   |           |           |           |
|---|-----------|-----------|-----------|
| O | -2.978418 | -0.387053 | 0.154039  |
| H | -2.393581 | -0.104607 | 0.871925  |
| H | -2.603902 | -1.223661 | -0.143810 |
| O | -1.300773 | 0.772487  | -1.780642 |
| H | -2.098462 | 0.611983  | -1.249390 |
| H | -0.830222 | 1.464641  | -1.293812 |
| O | 0.418078  | -1.800778 | 1.297820  |
| H | 0.047794  | -1.920878 | 0.401849  |
| H | 1.368312  | -1.744432 | 1.152412  |
| O | -0.712663 | -1.771020 | -1.193751 |
| H | -0.787070 | -0.842141 | -1.514325 |

|    |           |           |           |
|----|-----------|-----------|-----------|
| H  | -0.503316 | -2.317708 | -1.952348 |
| O  | -0.855577 | 0.450934  | 1.936929  |
| H  | -1.002689 | 0.487427  | 2.883953  |
| H  | -0.310504 | -0.358254 | 1.769510  |
| O  | -0.057200 | 2.433359  | 0.165513  |
| H  | -0.363507 | 1.873496  | 0.902345  |
| H  | -0.319924 | 3.333492  | 0.363293  |
| Cl | 1.877418  | 0.544373  | -0.282185 |
| O  | 2.721674  | -0.762141 | -0.254214 |

**(f)-IV**

0 2

|    |           |           |           |
|----|-----------|-----------|-----------|
| O  | 2.272241  | -1.879063 | 0.901931  |
| H  | 2.420958  | -2.673437 | 1.417091  |
| H  | 2.949119  | -0.968592 | -0.824677 |
| O  | 2.574140  | -0.482116 | -1.569518 |
| H  | 1.693861  | -0.872802 | -1.659645 |
| H  | 1.404044  | -1.972160 | 0.469829  |
| O  | 1.854025  | 0.791869  | 1.885295  |
| H  | 2.270774  | 1.342061  | 1.208832  |
| H  | 2.138855  | -0.112733 | 1.692369  |
| O  | 2.123121  | 2.046165  | -0.712823 |
| H  | 2.366129  | 1.189568  | -1.124066 |
| H  | 2.590333  | 2.730579  | -1.193738 |
| O  | -0.325329 | 0.994873  | 0.233688  |
| H  | 0.185998  | 1.594094  | -0.328305 |
| H  | 0.247008  | 0.923875  | 1.023684  |
| O  | 0.061108  | -1.483056 | -0.685648 |
| H  | -0.758757 | -1.933325 | -0.896587 |
| H  | -0.184253 | -0.577173 | -0.377955 |
| Cl | -2.971892 | 0.243427  | 0.055671  |
| O  | -4.409543 | -0.339700 | -0.097079 |

**(f)-V**

0 2

|   |          |           |           |
|---|----------|-----------|-----------|
| O | 1.888950 | -0.922462 | 1.786057  |
| H | 1.871970 | 0.045036  | 1.768308  |
| H | 2.479579 | -1.180108 | 1.065496  |
| O | 2.341955 | 1.137478  | -1.343636 |
| H | 2.505521 | 1.567206  | -0.494735 |
| H | 1.385079 | 1.237253  | -1.451504 |
| O | 1.478292 | 1.878622  | 1.277079  |
| H | 1.320348 | 2.584539  | 1.905391  |
| H | 0.659190 | 1.760713  | 0.759020  |
| O | 2.694485 | -1.514647 | -0.928667 |

|    |           |           |           |
|----|-----------|-----------|-----------|
| H  | 2.656513  | -0.565236 | -1.173514 |
| H  | 3.399745  | -1.906826 | -1.445075 |
| O  | -0.041933 | -1.490815 | -0.116164 |
| H  | 0.435696  | -1.393507 | 0.729592  |
| H  | 0.664718  | -1.786716 | -0.705930 |
| O  | -0.381019 | 1.116604  | -0.571157 |
| H  | -0.341166 | 0.136624  | -0.445209 |
| H  | -1.298938 | 1.326680  | -0.769803 |
| Cl | -3.137621 | -0.502815 | 0.312795  |
| O  | -3.280567 | 0.635495  | -0.735953 |



---

**Coordinates of the Cl(H<sub>2</sub>O)<sub>1-6</sub> geometries optimized with M06-2X/6-311++G(3df,3pd)**

---

**(a)-I**

0 2

|    |           |           |           |
|----|-----------|-----------|-----------|
| Cl | -0.961581 | 0.000003  | 0.002302  |
| O  | 1.612479  | -0.000002 | -0.118266 |
| H  | 1.723618  | 0.764665  | 0.453512  |
| H  | 1.723425  | -0.764705 | 0.453491  |

**(b)-I**

0 2

|    |           |           |           |
|----|-----------|-----------|-----------|
| Cl | -1.255403 | -0.465126 | -0.004738 |
| O  | 0.149484  | 1.479629  | -0.115105 |
| H  | 0.937268  | 0.905299  | -0.043016 |
| H  | -0.044960 | 1.778376  | 0.778515  |
| O  | 1.944249  | -0.574821 | 0.101089  |
| H  | 2.522836  | -0.856280 | -0.610463 |
| H  | 1.176838  | -1.158725 | 0.067641  |

**(c)-I**

0 2

|    |           |           |           |
|----|-----------|-----------|-----------|
| Cl | 1.526077  | -0.465238 | -0.325839 |
| O  | -1.443500 | -1.529771 | 0.330711  |
| H  | -1.620069 | -1.745929 | 1.248496  |
| H  | -0.480089 | -1.482661 | 0.251447  |
| O  | -1.723296 | 1.049536  | -0.538225 |
| H  | -1.824402 | 0.113906  | -0.276386 |
| H  | -1.685168 | 1.049528  | -1.496760 |
| O  | 0.521328  | 1.313454  | 0.839115  |
| H  | 1.122614  | 1.978039  | 0.488723  |
| H  | -0.292445 | 1.330418  | 0.270933  |

**(c)-II**

0 2

|    |           |           |           |
|----|-----------|-----------|-----------|
| Cl | -1.470647 | -0.698990 | -0.027147 |
| O  | -0.913355 | 1.577529  | -0.052111 |
| H  | -1.206386 | 1.729986  | 0.852040  |
| H  | 0.072987  | 1.467207  | -0.010632 |
| O  | 1.647411  | -1.496041 | -0.052514 |
| H  | 0.679548  | -1.491657 | -0.097306 |
| H  | 1.870397  | -2.040968 | 0.704723  |
| O  | 1.705942  | 1.216359  | 0.059878  |
| H  | 2.218106  | 1.586522  | -0.661403 |
| H  | 1.846354  | 0.248973  | 0.032056  |

**(d)-I**

0 2

|    |           |           |           |
|----|-----------|-----------|-----------|
| Cl | -1.938096 | 0.111637  | -0.629926 |
| O  | 0.693134  | 1.931040  | 0.301501  |
| H  | 0.109575  | 2.139198  | -0.433326 |
| H  | 0.149738  | 1.371928  | 0.874051  |
| O  | 2.552904  | 0.098649  | -0.516738 |
| H  | 1.988974  | 0.847164  | -0.236302 |
| H  | 3.403403  | 0.219677  | -0.092484 |
| O  | -0.685152 | -0.315460 | 1.374377  |
| H  | -1.379498 | -0.761564 | 1.866655  |
| H  | -0.143225 | -1.009309 | 0.892274  |
| O  | 0.804905  | -1.889594 | -0.039898 |
| H  | 1.542935  | -1.273302 | -0.241842 |
| H  | 0.349403  | -2.028699 | -0.874222 |

**(d)-II**

0 2

|    |           |           |           |
|----|-----------|-----------|-----------|
| Cl | 1.936918  | 0.111226  | -0.630097 |
| O  | -2.550177 | 0.100044  | -0.517654 |
| H  | -3.400764 | 0.221944  | -0.093788 |
| H  | -1.985515 | 0.847951  | -0.236612 |
| O  | -0.691985 | 1.932445  | 0.302235  |
| H  | -0.107393 | 2.140231  | -0.431907 |
| H  | -0.150273 | 1.371199  | 0.874376  |
| O  | 0.684457  | -0.315818 | 1.373845  |
| H  | 0.142969  | -1.010157 | 0.892065  |
| H  | 1.378063  | -0.761293 | 1.867777  |
| O  | -0.806087 | -1.890983 | -0.039058 |
| H  | -1.542830 | -1.273313 | -0.241772 |
| H  | -0.351541 | -2.032903 | -0.873436 |

**(e)-I**

0 2

|    |           |           |           |
|----|-----------|-----------|-----------|
| Cl | -2.532704 | -0.054849 | -0.104871 |
| O  | -0.040867 | 0.440838  | 1.852191  |
| H  | 0.344088  | -0.424161 | 1.645947  |
| H  | -0.974254 | 0.337374  | 1.620798  |
| O  | 2.962550  | -0.000348 | -0.487461 |
| H  | 2.372347  | 0.773162  | -0.508445 |
| H  | 3.740049  | 0.268206  | 0.004674  |
| O  | 0.827951  | 1.730513  | -0.299104 |
| H  | 0.637903  | 2.668446  | -0.353072 |
| H  | 0.501095  | 1.405383  | 0.576492  |
| O  | 1.081372  | -1.712234 | 0.401101  |

|   |           |           |           |
|---|-----------|-----------|-----------|
| H | 1.275606  | -2.649742 | 0.446313  |
| H | 1.892530  | -1.253311 | 0.097126  |
| O | -0.624907 | -0.411168 | -1.426778 |
| H | -0.218967 | 0.453405  | -1.237784 |
| H | -0.163215 | -1.027138 | -0.828839 |

**(e)-II**

0 2

|    |           |           |           |
|----|-----------|-----------|-----------|
| Cl | 1.638237  | -0.898867 | -0.389970 |
| O  | -0.246027 | -1.925482 | 0.460927  |
| H  | 1.385334  | 1.081926  | 0.703524  |
| H  | -0.851378 | -1.647899 | -0.251409 |
| O  | -1.174532 | 0.181274  | 1.850169  |
| H  | -1.823411 | 0.254389  | 1.137699  |
| H  | -0.433503 | -1.244349 | 1.151494  |
| O  | -0.264797 | 1.478387  | -1.657032 |
| H  | 0.441015  | 0.835198  | -1.794563 |
| H  | 0.021290  | 1.954161  | -0.865088 |
| O  | -2.114503 | -0.301521 | -0.829193 |
| H  | -1.547150 | 0.395504  | -1.224295 |
| H  | -2.887217 | -0.388941 | -1.389330 |
| O  | 0.910239  | 1.896976  | 0.932422  |
| H  | 1.539249  | 2.471566  | 1.373293  |
| H  | -0.577299 | 0.932107  | 1.729811  |

**(e)-III**

0 2

|    |           |           |           |
|----|-----------|-----------|-----------|
| Cl | 1.916458  | -0.632175 | -0.438940 |
| O  | -1.047681 | -1.734531 | -1.056734 |
| H  | -0.092917 | -1.585327 | -1.116529 |
| H  | -1.444967 | -0.934793 | -1.422458 |
| O  | -1.366389 | -0.840831 | 1.418492  |
| H  | -1.707115 | -1.400114 | 2.118508  |
| H  | -1.274536 | -1.390535 | 0.604766  |
| O  | 0.357457  | 2.297324  | -0.395274 |
| H  | 0.937539  | 1.952783  | -1.081097 |
| H  | -0.521915 | 1.942163  | -0.599097 |
| O  | 1.114160  | 0.464424  | 1.453277  |
| H  | 0.863790  | 1.237703  | 0.896193  |
| H  | 0.295161  | -0.058304 | 1.546735  |
| O  | -2.127630 | 0.946176  | -0.564929 |
| H  | -2.115643 | 0.500924  | 0.298028  |
| H  | -2.958513 | 1.421981  | -0.621743 |

**(f)-I**

0 2

|    |           |           |           |
|----|-----------|-----------|-----------|
| Cl | 2.502469  | -0.215743 | -0.184273 |
| O  | 0.018832  | 0.816228  | -1.945811 |
| H  | -0.247755 | 1.504965  | -1.317648 |
| H  | 0.901107  | 0.550696  | -1.648802 |
| O  | -2.485674 | 0.175296  | 0.862516  |
| H  | -2.103163 | -0.439729 | 1.497506  |
| H  | -2.450283 | -0.309581 | 0.022452  |
| O  | -0.777806 | 2.179303  | 0.373164  |
| H  | -1.508761 | 1.566896  | 0.616217  |
| H  | -1.017268 | 3.057778  | 0.672141  |
| O  | -1.559015 | -1.205689 | -1.394052 |
| H  | -1.896301 | -1.667382 | -2.162718 |
| H  | -0.971560 | -0.470735 | -1.713792 |
| O  | -0.444188 | -1.885470 | 1.013947  |
| H  | -0.728536 | -1.851108 | 0.082037  |
| H  | 0.174344  | -2.615950 | 1.085297  |
| O  | 1.031156  | 0.375351  | 1.530403  |
| H  | 0.558257  | 1.120693  | 1.116557  |
| H  | 0.481512  | -0.419064 | 1.362046  |

**(f)-II**

0 2

|    |           |           |           |
|----|-----------|-----------|-----------|
| Cl | 0.036792  | -0.974948 | 1.322166  |
| O  | -2.265448 | 1.277410  | 0.663465  |
| H  | -1.792342 | 0.795698  | 1.350783  |
| H  | -1.557988 | 1.736063  | 0.186548  |
| O  | -2.785782 | -0.906294 | -0.910570 |
| H  | -2.815116 | -0.111327 | -0.340486 |
| H  | -3.236097 | -1.603170 | -0.429903 |
| O  | 2.655059  | -1.118603 | -0.885059 |
| H  | 2.973580  | -1.842440 | -0.341937 |
| H  | 1.707451  | -1.281464 | -0.997907 |
| O  | 0.126751  | 1.945457  | -0.773123 |
| H  | 0.272565  | 2.554340  | -1.499354 |
| H  | 0.991676  | 1.837904  | -0.300160 |
| O  | -0.151923 | -0.749482 | -1.004143 |
| H  | -1.120746 | -0.967664 | -1.016239 |
| H  | -0.100902 | 0.232391  | -1.025598 |
| O  | 2.351473  | 1.277588  | 0.485602  |
| H  | 2.595636  | 0.464080  | 0.002139  |
| H  | 2.015776  | 0.951099  | 1.325919  |

**(f)-III**

0 2

|    |           |           |           |
|----|-----------|-----------|-----------|
| Cl | -2.499548 | -1.119794 | -0.056461 |
| O  | 2.476083  | 0.958935  | 0.082955  |
| H  | 1.920852  | 1.110210  | 0.860557  |
| H  | 2.748208  | 0.028473  | 0.142955  |
| O  | -1.433468 | 2.004791  | -0.099541 |
| H  | -2.106642 | 1.317355  | -0.170866 |
| H  | -0.839371 | 1.838604  | -0.848696 |
| O  | 0.171704  | 1.005102  | 1.777800  |
| H  | -0.094427 | 1.116631  | 2.691775  |
| H  | -0.466923 | 1.509085  | 1.219427  |
| O  | 0.568501  | 0.928222  | -1.743355 |
| H  | 1.382157  | 1.025399  | -1.185984 |
| H  | 0.834874  | 0.963548  | -2.663154 |
| O  | 2.629107  | -1.833466 | 0.012138  |
| H  | 2.995929  | -2.549397 | 0.532452  |
| H  | 1.666120  | -1.926950 | 0.046671  |
| O  | -0.101847 | -1.109307 | 0.011296  |
| H  | -0.045775 | -0.498305 | 0.773192  |
| H  | 0.016689  | -0.532371 | -0.768830 |
